# Supplementary material
Source: bioRxiv or medRxiv preprint supplement (https://medrxiv.org/highwire/filestream/95390/field_highwire_adjunct_files/0/2020.09.01.20185603-1.pdf)

## Integrative Genetics Analysis of Juvenile Idiopathic Arthritis Identifies Novel Loci

**Table S1.** The composition of the 7 subtypes in the JIA cohort after quality control filtering. A common set of controls having no history of any existing autoimmune or immune-mediated diseases was used in association analyses.

| Subtype Name                         | Abbreviation | Case | Female % | Control |
|--------------------------------------|--------------|------|----------|---------|
| <b>Enthesitis-Related Arthritis</b>  | ENT          | 161  | 39.1     | 9250    |
| <b>Polyarthritis RF Negative</b>     | PRFN         | 284  | 73.6     | 9250    |
| <b>Polyarthritis RF Positive</b>     | PRFP         | 56   | 92.9     | 9250    |
| <b>Oligoarthritis</b>                | OLG          | 460  | 76.7     | 9250    |
| <b>Psoriatic Arthritis</b>           | PSO          | 88   | 73.9     | 9250    |
| <b>Systemic Arthritis</b>            | SYS          | 109  | 56.9     | 9250    |
| <b>Undifferentiated Arthritis</b>    | UND          | 87   | 56.3     | 9250    |
| <b>Juvenile Idiopathic Arthritis</b> | JIA          | 1245 | 68.5     | 9250    |

The percentage of female among controls is 46.8%.

**Table S2.** The genome-wide significant loci from hsGWAS that have been reported in literature.

| SNP         | Chr | Pos       | Diseases                      | reported SNP | r-Chr | r-Pos     | A1 | Beta  | 95% CI                    | P-value  | PMID     |
|-------------|-----|-----------|-------------------------------|--------------|-------|-----------|----|-------|---------------------------|----------|----------|
| rs2066363   | 1   | 82237577  | Pediatric autoimmune diseases | rs2066363    | 1     | 82237577  |    |       |                           | 8.00E-11 | 26301688 |
| rs144844686 | 2   | 234576970 | Pediatric autoimmune diseases | rs36001488   | 2     | 233276621 | C  |       |                           | 8.00E-11 | 26301688 |
|             |     |           | Crohn's disease               | rs3792109    | 2     | 233275771 | A  | 1.34  | [1.29-1.40]               | 7.00E-41 | 21102463 |
| rs7660520   | 4   | 182824168 | Pediatric autoimmune diseases | rs7660520    | 4     | 182824168 | A  |       |                           | 8.00E-11 | 26301688 |
|             |     |           | Systemic lupus erythematosus  | rs10018951   | 4     | 183688220 | T  | 1.31  | [NR]                      | 1.00E-14 | 23740775 |
| rs7731626   | 5   | 56148856  | Pediatric autoimmune diseases | rs7731626    | 5     | 56148856  | A  |       |                           | 1.00E-10 | 26301688 |
|             |     |           | Rheumatoid arthritis          | rs7731626    | 5     | 56148856  | A  | 0.193 | [0.15-0.23] unit decrease | 8.00E-23 | 24390342 |
| rs12203592  | 6   | 396321    | Inflammatory bowel disease    | rs7773324-A  | 6     | 382559    | A  | 1.06  |                           | 6.00E-09 | 26192919 |
|             |     |           | Crohn's disease               | rs7773324-A  | 6     | 382559    | A  | 1.08  | [1.06-1.11]               | 1.00E-09 | 26192919 |
|             |     |           | Rheumatoid arthritis          | rs9378815    | 6     | 426155    | C  | 1.09  | [1.06-1.12]               | 2.00E-10 | 24390342 |

SNP=index SNP at each locus in our study; Chr=chromosome; Pos=Position on genome-build hg19; Disease=associated disease reported in literature; reported SNP=the index SNP at each locus reported in literature; r-Chr=the chromosome of the reported SNP; r-Pos=the position of the reported SNP; A1, Beta, 95% CI and P-value =the effect allele, the regression coefficient, the 95% confidence interval, the association p-value for the reported SNP; PMID= the pubmed ID of the literature.

**Table S3.** The association statistics in conditional analyses at loci 3q28, 4q34.3, 7q11.22 and 18q21.1

| LOCUS   | STEP | TOP SNP    | CHR | POS       | A1 | MAF   | BETA   | SE     | P-value  |
|---------|------|------------|-----|-----------|----|-------|--------|--------|----------|
| 3q28    | 1    | rs7636581  | 3   | 189781195 | A  | 0.12  | 0.783  | 0.095  | 2.32E-16 |
|         | 2    | rs6763934  | 3   | 189780459 | T  | 0.11  | -1.448 | 0.193  | 6.70E-14 |
| 4q34.3  | 1    | rs13119493 | 4   | 180911259 | G  | 0.048 | 0.700  | 0.124  | 1.48E-08 |
|         | 2    | rs11131944 | 4   | 180687498 | G  | 0.16  | 0.347  | 0.0707 | 9.23E-07 |
| 7q11.22 | 1    | rs727845   | 7   | 67607209  | G  | 0.19  | -0.351 | 0.0632 | 2.82E-08 |
|         | 2    | rs9654878  | 7   | 67610420  | T  | 0.19  | 1.843  | 0.235  | 5.00E-15 |
| 18q21.1 | 1    | rs11663074 | 18  | 45023793  | C  | 0.17  | -0.650 | 0.0609 | 1.26E-26 |
|         | 2    | rs11659667 | 18  | 45023809  | G  | 0.19  | 1.760  | 0.128  | 4.69E-43 |

STEP=the order of steps in step-wise conditional analysis; TOP SNP=the most significantly associated SNP at each step of the analysis; CHR=chromosome; POS=Position (bp); A1=alternative allele; MAF=minor allele frequency; BETA=the coefficient in association testing; SE=standard error; P\_value=nominal P-value at each step of the conditional association analysis.

**Table S4.** The 28 loci associated with JIA at genome-wide marginal significance in hsGWAS ( $5 \times 10^{-8} < P\text{-value} < 1 \times 10^{-6}$ )

| SNP             | Chr | Pos           | Cytoband | Gene              | Annotati<br>on | A<br>1 | MAF        | hsGWAS<br>_P | JIA_sub                       |
|-----------------|-----|---------------|----------|-------------------|----------------|--------|------------|--------------|-------------------------------|
| rs55857240      | 1   | 5934103       | 1p36.31  | NPHP4             | intronic       | G      | 0.052<br>2 | 5.08E-07     | PRFN,PRFP,OLG,SYS             |
| rs34822619      | 1   | 1082356<br>14 | 1p13.3   | VAV3              | intronic       | G      | 0.034<br>7 | 2.03E-07     | PRFN,OLG,PSO,SYS,UND          |
| rs2714572       | 2   | 3569581<br>3  | 2p22.3   | MIR548AD          | 657bp 5'       | T      | 0.184      | 6.09E-07     | PRFP,OLG,UND                  |
| rs11214422<br>3 | 2   | 5845494<br>7  | 2p16.1   | FANCL             | intronic       | T      | 0.011<br>4 | 7.17E-08     | PRFP,OLG,PSO,UND              |
| rs18192689<br>6 | 2   | 8387227<br>1  | 2p11.2   | U6                | 13kb 5'        | A      | 0.011<br>7 | 1.36E-07     | ENT,PSO                       |
| rs36029722      | 2   | 1829424<br>51 | 2q31.3   | PPP1R1C           | intronic       | A      | 0.015<br>6 | 8.05E-08     | PRFN,PRFP,OLG,PSO,UND         |
| rs79213572      | 2   | 2298032<br>42 | 2q36.3   | PID1              | 3'             | G      | 0.066<br>9 | 1.10E-07     | ENT,PRFN,OLG,PSO,SYS,UND      |
| rs14017624<br>2 | 3   | 1761577<br>7  | 3p24.3   | TBC1D5            | intronic       | G      | 0.017<br>6 | 1.29E-07     | UND                           |
| rs6856482       | 4   | 4022201<br>7  | 4p14     | RHOH              | intronic       | G      | 0.430      | 6.35E-07     | ENT,PRFN,PRFP,OLG,PSO         |
| rs62322747      | 4   | 1234564<br>57 | 4q27     | IL21              | 77kb 3'        | A      | 0.322      | 6.67E-07     | PRFN,PRFP,OLG                 |
| rs11533402<br>3 | 4   | 1412638<br>31 | 4q31.1   | RP11-4251<br>13.3 | intronic       | T      | 0.028<br>4 | 9.29E-07     | PRFP,OLG,PSO,SYS              |
| rs14320084<br>4 | 4   | 1464248<br>29 | 4q31.21  | SMAD1             | intronic       | A      | 0.015<br>5 | 7.82E-08     | PRFN                          |
| rs18915730<br>4 | 4   | 1788762<br>65 | 4q34.3   | RP11-389E<br>17.1 | intronic       | G      | 0.012<br>1 | 6.46E-07     | ENT,PRFN,OLG,PSO,UND          |
| rs11511200<br>2 | 5   | 1136878<br>22 | 5q22.3   | KCNN2             | 8.8kb 5'       | A      | 0.013<br>7 | 7.25E-07     | ENT,PRFN,PRFP,OLG,SYS,UN<br>D |
| rs11242863      | 6   | 3570361       | 6p25.2   | RP1-223B1<br>.1   | 24kb 3'        | A      | 0.383      | 9.43E-08     | ENT,PRFN,PRFP,OLG,PSO,SYS     |
| rs6918563       | 6   | 2562257<br>1  | 6p22.2   | LRRC16A           | 1.8kb 3'       | G      | 0.146      | 6.05E-07     | PRFN,OLG,SYS                  |
| rs1555688       | 6   | 3383724<br>2  | 6p21.31  | RP3-468B3<br>.3   | 3'             | G      | 0.094<br>0 | 1.22E-07     | ENT,PRFP,OLG,PSO,UND          |
| rs11394194<br>6 | 6   | 1297188<br>76 | 6q22.33  | LAMA2             | intronic       | T      | 0.029<br>5 | 4.55E-07     | ENT,PRFN,PRFP,SYS,UND         |
| rs15103906<br>5 | 6   | 1489644<br>77 | 6q24.3   | SASH1             | 91kb 3'        | G      | 0.058<br>6 | 6.35E-07     | PRFN,PRFP,OLG,SYS             |
| rs11814828<br>5 | 7   | 4816205<br>6  | 7p12.3   | UPP1              | 14kb 3'        | G      | 0.029<br>1 | 3.11E-07     | ENT,PRFP,OLG,SYS              |
| rs74608517      | 7   | 1077830<br>22 | 7q31.1   | NRCAM             | 5.1kb 3'       | T      | 0.020<br>7 | 5.09E-07     | ENT,PRFN,PRFP,OLG,SYS         |
| rs3112343       | 7   | 1353869<br>64 | 7q33     | SLC13A4           | intronic       | G      | 0.040<br>5 | 2.05E-07     | PRFP,OLG,PSO,SYS              |
| rs14232152<br>1 | 8   | 1040899<br>20 | 8q22.3   | ATP6V1C1          | 4.6kb 3'       | G      | 0.013<br>6 | 5.63E-07     | ENT,PRFN,OLG,SYS              |
| rs628920        | 9   | 1359620<br>85 | 9q34.2   | snoU13            | 6.4kb 5'       | C      | 0.232      | 2.56E-07     | PRFN,OLG,PSO,UND              |
| rs7080552       | 10  | 5059369<br>5  | 10q11.23 | DRGX              | intronic       | G      | 0.339      | 6.03E-07     | ENT,PRFN,PRFP,PSO             |
| rs73241417      | 13  | 7774115<br>8  | 13q22.3  | MYCBP2            | intronic       | A      | 0.024<br>1 | 9.18E-07     | SYS                           |
| rs2134802       | 13  | 8994035<br>4  | 13q31.2  | LINC00440         | 7.9kb 3'       | C      | 0.010<br>9 | 2.50E-07     | SYS                           |
| rs16943576      | 15  | 9031624<br>9  | 15q26.1  | MESP2             | 3'             | G      | 0.050<br>4 | 1.65E-07     | ENT,PRFN,PRFP,OLG,PSO,UN<br>D |

**Table S5.** The significant association between the GWS SNPs from our hsGWAS and the phenotypes in UK Biobank.

| SNP         | Phenotype                    | OR    | 95% CI       | SE     | Cases | P-value   |
|-------------|------------------------------|-------|--------------|--------|-------|-----------|
| rs12203592  | Rheumatoid factor > 16 IU/mL | 0.921 | 0.896, 0.947 | 0.0143 | 16700 | 8.792E-09 |
| rs7731626   | rheumatoid arthritis         | 0.886 | 0.851, 0.921 | 0.0201 | 5586  | 1.468E-09 |
| rs7660520   | Psoriasis                    | 0.929 | 0.887, 0.974 | 0.0238 | 5074  | 1.468E-09 |
|             | Psoriasis arthropathy        | 0.859 | 0.770, 0.958 | 0.0558 | 954   | 6.50E-03  |
| rs114664970 | Chronic sinusitis            | 1.235 | 1.052, 1.451 | 0.0821 | 4393  | 1.00E-02  |

**Table S6.** The association of the GWS loci with JIA in previously reported immunohip data (Hinks et al., 2013).

| hsGWAS      |     |           |          | Immunohip  |     |           |          |        |           |
|-------------|-----|-----------|----------|------------|-----|-----------|----------|--------|-----------|
| SNP         | CHR | POS       | P_adj    | SNP        | CHR | POS       | Pvalue   | beta   | snp_count |
| rs2066363   | 1   | 82237577  | 6.82E-11 | rs6696329  | 1   | 82692386  | 2.58E-02 | 0.125  | 18        |
| rs144844686 | 2   | 234576970 | 7.40E-09 | rs11694654 | 2   | 234332343 | 8.46E-04 | 0.292  | 487       |
| rs7636581   | 3   | 189781195 | 6.82E-11 | rs4398410  | 3   | 189344011 | 3.37E-02 | -0.118 | 11        |
| rs13119493  | 4   | 180911259 | 3.26E-08 | rs1458669  | 4   | 180747463 | 4.99E-02 | -0.134 | 14        |
| rs7660520   | 4   | 183745321 | 6.82E-11 | rs6841520  | 4   | 183553379 | 3.61E-02 | -0.260 | 12        |
| rs7731626   | 5   | 55444683  | 4.62E-10 | rs10065637 | 5   | 55438851  | 9.95E-06 | -0.319 | 77        |
| rs12203592  | 6   | 396321    | 4.62E-09 | rs55683615 | 6   | 441043    | 4.05E-04 | -0.194 | 193       |
| rs114664970 | 6   | 40127169  | 1.03E-08 | rs7753175  | 6   | 39863295  | 5.98E-02 | -0.417 | 11        |
| rs727845    | 7   | 67607209  | 4.49E-08 | rs6953349  | 7   | 67728697  | 1.69E-01 | 0.255  | 9         |
| rs7042370   | 9   | 12785073  | 1.39E-09 | rs10122431 | 9   | 13137049  | 6.71E-02 | -0.106 | 8         |
| rs117572873 | 10  | 91997663  | 1.52E-08 | rs1886409  | 10  | 91680365  | 3.19E-01 | 0.0583 | 6         |
| rs17703382  | 11  | 30715593  | 2.76E-09 | rs507969   | 11  | 30830612  | 2.47E-02 | -0.130 | 15        |
| rs12795402  | 11  | 32255936  | 4.19E-08 | rs2207550  | 11  | 32310891  | 1.23E-02 | 0.136  | 11        |
| rs147585949 | 16  | 20726695  | 1.98E-09 | rs13339094 | 16  | 21097770  | 5.19E-03 | -0.166 | 5         |
| rs11663074  | 18  | 45023793  | 6.82E-11 | rs2571034  | 18  | 44578565  | 2.21E-02 | -0.126 | 13        |
| rs138816451 | 22  | 43649657  | 1.63E-09 | rs9623807  | 22  | 43704052  | 5.50E-02 | 0.168  | 17        |

SNP-count: The total number of SNPs at each locus in the immunohip dataset.

**Table S7.** The causal variants identified at each locus.

| Locus    | Causal variants | Chr | Pos       | A1 | Association P-value | Prob  |
|----------|-----------------|-----|-----------|----|---------------------|-------|
| 3q28     | rs7636581       | 3   | 189781195 | G  | 2.32E-16            | 1     |
| 4q34.3   | rs11131944      | 4   | 180687498 | A  | 8.98E-06            | 0.307 |
| 6p21.2   | rs114664970     | 6   | 40127169  | T  | 1.10E-18            | 0.998 |
| 7q11.22  | rs727845        | 7   | 67607209  | A  | 2.82E-08            | 1     |
| 9p23     | rs7042370       | 9   | 12785073  | T  | 1.20E-11            | 1     |
| 10q23.31 | rs146684573     | 10  | 92002571  | C  | 4.80E-09            | 0.232 |
|          | rs144590246     | 10  | 92000291  | G  | 5.58E-09            | 0.201 |
| 11p13    | rs17703382      | 11  | 30715593  | C  | 3.11E-25            | 0.992 |
| 16p12.3  | rs147585949     | 16  | 20726695  | G  | 3.52E-10            | 0.508 |
| 18q21.1  | rs11663074      | 18  | 45023793  | C  | 1.26E-26            | 1     |
| 22q13.2  | rs138816451     | 22  | 43649657  | G  | 3.82E-12            | 1     |

Chr=chromosome; Pos=position; A1=alternative allele; Association P-value=P-value in the original hsGWAS; Prob=the posterior probability.

**Table S8.** Significant association between JIA subtypes and imputed classical HLA-A, HLA-C, HLA-B, HLA-DRB1, HLADQB1, HLA-DQA and HLA-DPB1 alleles. The HLA class I and HLA class II alleles were analyzed at a 2-digit level based on the 2×2 table. Since a total of 116 HLA alleles were tested, the significance threshold was set as P-value < 4.31e-04.

| Enthesitis-Related Arthritis (ENT) |           |              |        |           |
|------------------------------------|-----------|--------------|--------|-----------|
| SNP                                | Freq_case | Freq_control | OR     | P         |
| HLA_B_27                           | 0.29      | 0.037        | 10.56  | 3.91E-112 |
| HLA_C_01                           | 0.20      | 0.032        | 7.38   | 4.63E-57  |
| HLA_DRB1_08                        | 0.12      | 0.027        | 4.74   | 8.10E-22  |
| HLA_DQB1_04                        | 0.11      | 0.026        | 4.56   | 2.36E-19  |
| HLA_C_02                           | 0.13      | 0.041        | 3.58   | 5.05E-16  |
| HLA_DRB1_01                        | 0.18      | 0.11         | 1.76   | 0.0001138 |
| Polyarthritis RF Negative (PRFN)   |           |              |        |           |
| SNP                                | Freq_case | Freq_control | OR     | P         |
| HLA_DQB1_04                        | 0.13      | 0.026        | 5.51   | 1.92E-46  |
| HLA_DRB1_08                        | 0.13      | 0.027        | 5.22   | 2.44E-43  |
| HLA_B_40                           | 0.11      | 0.054        | 2.27   | 5.16E-10  |
| HLA_DRB1_07                        | 0.056     | 0.14         | 0.381  | 4.41E-08  |
| HLA_B_27                           | 0.079     | 0.037        | 2.238  | 2.44E-07  |
| HLA_C_01                           | 0.070     | 0.032        | 2.3    | 4.18E-07  |
| HLA_DQB1_02                        | 0.14      | 0.22         | 0.580  | 7.60E-06  |
| HLA_A_02                           | 0.36      | 0.28         | 1.481  | 8.72E-06  |
| HLA_C_03                           | 0.17      | 0.11         | 1.633  | 1.39E-05  |
| HLA_DPB1_02                        | 0.21      | 0.15         | 1.567  | 1.59E-05  |
| HLA_C_06                           | 0.049     | 0.098        | 0.476  | 9.97E-05  |
| Polyarthritis RF Positive (PRFP)   |           |              |        |           |
| SNP                                | Freq_case | Freq_control | OR     | P         |
| HLA_DRB1_04                        | 0.36      | 0.15         | 3.063  | 2.84E-09  |
| HLA_B_08                           | 0.23      | 0.11         | 2.557  | 1.53E-05  |
| HLA_DPB1_26                        | 0.0089    | 0.00043      | 20.82  | 4.55E-05  |
| HLA_C_03                           | 0.23      | 0.11         | 2.397  | 6.12E-05  |
| HLA_DRB1_07                        | 0.0089    | 0.14         | 0.0575 | 9.13E-05  |
| Oligoarthritis (OLG)               |           |              |        |           |
| SNP                                | Freq_case | Freq_control | OR     | P         |
| HLA_DRB1_08                        | 0.17      | 0.027        | 7.01   | 3.48E-112 |
| HLA_DQB1_04                        | 0.16      | 0.026        | 6.937  | 5.23E-106 |
| HLA_A_02                           | 0.42      | 0.28         | 1.863  | 5.52E-20  |
| HLA_DPB1_02                        | 0.26      | 0.15         | 2.007  | 1.51E-19  |
| HLA_B_40                           | 0.12      | 0.054        | 2.315  | 1.24E-15  |
| HLA_DRB1_07                        | 0.045     | 0.14         | 0.297  | 1.49E-15  |
| HLA_DRB1_04                        | 0.070     | 0.15         | 0.412  | 3.19E-12  |
| HLA_C_03                           | 0.18      | 0.11         | 1.72   | 7.97E-10  |
| HLA_C_06                           | 0.041     | 0.098        | 0.395  | 9.46E-09  |
| HLA_B_39                           | 0.045     | 0.019        | 2.384  | 1.07E-07  |
| HLA_DRB1_13                        | 0.16      | 0.11         | 1.604  | 2.49E-07  |
| HLA_DQB1_02                        | 0.15      | 0.22         | 0.632  | 9.93E-07  |
| HLA_B_27                           | 0.067     | 0.037        | 1.879  | 2.95E-06  |
| HLA_DQB1_03                        | 0.29      | 0.36         | 0.734  | 2.74E-05  |
| HLA_DRB1_15                        | 0.090     | 0.14         | 0.623  | 4.39E-05  |
| HLA_B_57                           | 0.014     | 0.038        | 0.362  | 0.000173  |
| Psoriatic Arthritis (PSO)          |           |              |        |           |
| SNP                                | Freq_case | Freq_control | OR     | P         |
| HLA_DQB1_04                        | 0.085     | 0.026        | 3.483  | 1.21E-06  |
| HLA_DRB1_08                        | 0.080     | 0.027        | 3.061  | 3.01E-05  |
| HLA_DPB1_19                        | 0.028     | 0.0056       | 5.223  | 6.96E-05  |
| HLA_B_27                           | 0.091     | 0.037        | 2.601  | 0.000182  |
| HLA_C_02                           | 0.097     | 0.041        | 2.485  | 0.000259  |
| HLA_A_02                           | 0.40      | 0.28         | 1.732  | 0.000330  |
| Undifferentiated Arthritis (UND)   |           |              |        |           |
| SNP                                | Freq_case | Freq_control | OR     | P         |
| HLA_DQB1_04                        | 0.11      | 0.026        | 4.582  | 1.42E-11  |
| HLA_DRB1_08                        | 0.11      | 0.027        | 4.341  | 9.16E-11  |
| HLA_B_27                           | 0.092     | 0.037        | 2.634  | 0.000148  |

Freq\_case= The frequency of HLA alleles in JIA cases of the particular subtype; Freq\_control= the frequency of HLA alleles in controls of the cohort; OR= odds ratio.



**Table S9.** Pathways over-presented among the candidate genes at genome-wide significant loci.

| Gene Set | Description                                              | Size | Overlap | Enrichment Ratio | P-Value  | FDR      | Overlap genes           |
|----------|----------------------------------------------------------|------|---------|------------------|----------|----------|-------------------------|
| hsa04659 | Th17 cell differentiation                                | 107  | 4       | 33.98            | 2.97E-06 | 9.67E-04 | SMAD2;IRF4;IL1RAP;IL6ST |
| hsa04550 | Signaling pathways regulating pluripotency of stem cells | 139  | 2       | 13.08            | 0.00942  | 1        | SMAD2;IL6ST             |
| hsa04060 | Cytokine-cytokine receptor interaction                   | 294  | 2       | 6.18             | 0.0388   | 1        | IL1RAP;IL6ST            |

Size=the total number of genes in each pathway; Overlap=the number of genes overlapped between the input gene list and the pathway genes

**Table S10.** GO pathways over-presented among the candidate genes at genome-wide significant loci.

| Gene Set   | Description                                               | Size | Overlap | Enrichment Ratio | P-Value  | FDR   | Overlap genes      |
|------------|-----------------------------------------------------------|------|---------|------------------|----------|-------|--------------------|
| GO:0032616 | interleukin-13 production                                 | 24   | 2       | 94.92            | 1.94E-04 | 0.165 | IRF4;IL1RAP        |
| GO:0032633 | interleukin-4 production                                  | 34   | 2       | 67               | 3.93E-04 | 0.167 | IRF4;IL1RAP        |
| GO:0032623 | interleukin-2 production                                  | 63   | 2       | 36.16            | 0.00135  | 0.318 | IRF4;IL1RAP        |
| GO:0098742 | cell-cell adhesion via plasma-membrane adhesion molecules | 270  | 3       | 12.66            | 0.00150  | 0.318 | IL1RAP;CLDN1;TENM3 |
| GO:0042107 | cytokine metabolic process                                | 106  | 2       | 21.49            | 0.00376  | 0.639 | IRF4;IL1RAP        |
| GO:0001819 | positive regulation of cytokine production                | 418  | 3       | 8.17             | 0.00517  | 0.733 | IRF4;IL1RAP;IL6ST  |
| GO:0050769 | positive regulation of neurogenesis                       | 447  | 3       | 7.64             | 0.00624  | 0.757 | KIF20B;TENM3;IL6ST |
| GO:0006091 | generation of precursor metabolites and energy            | 469  | 3       | 7.29             | 0.00712  | 0.757 | ACSM1;TYRP1;IL6ST  |
| GO:0034341 | response to interferon-gamma                              | 192  | 2       | 11.86            | 0.0119   | 0.943 | IRF4;CLDN1         |
| GO:0050803 | regulation of synapse structure or activity               | 221  | 2       | 10.31            | 0.0155   | 0.943 | LRFN2;IL1RAP       |

**Table S11.** The candidate genes at genome-wide significant loci which are drug target genes.

| SNP         | Gene   | Drug                                                                                                      |
|-------------|--------|-----------------------------------------------------------------------------------------------------------|
| rs7660520   | DCTD   | Cytarabine, gemcitabine                                                                                   |
| rs114664970 | KIF6   | pravastatin, atorvastatin, rosuvastatin, simvastatin,                                                     |
| rs144844686 | UGT1A8 | Mycophenolatemofetil, Diflunisal, Naproxen, Nintedanib, methotrexate, cyclosporine, sirolimus, tacrolimus |
|             | ACKR3  | plerixafor                                                                                                |
| rs144844687 | TRPM8  | levomenthol                                                                                               |
|             | UGT1A7 | Mycophenolatemofetil, Diflunisal, Naproxen, Nintedanib, methotrexate                                      |
| rs117572873 | HTR7   | hmg coa reductase inhibitors, atorvastatin, pravastatin, simvastatin                                      |
| rs147585951 | PLK1   | Fostamatinib                                                                                              |
| rs7636581   | IL1RAP | IL-1 blockade                                                                                             |
| rs138816451 | SCUBE1 | Angiogenesis Inhibitors                                                                                   |

**Fig. S1.** The quantile–quantile (QQ) plot of the hsGWAS of JIA cases vs. the controls.

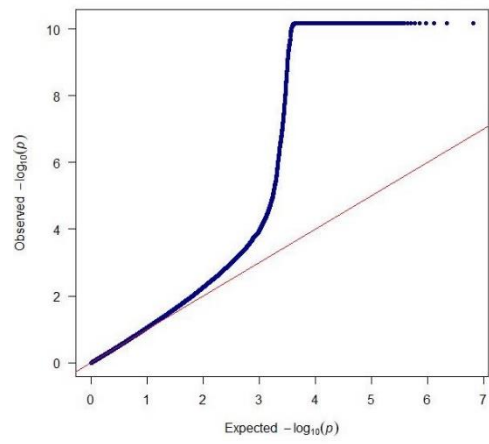

**Fig. S2** Regional association plots of genetic loci previously reported to be associated with JIA or other autoimmune diseases.

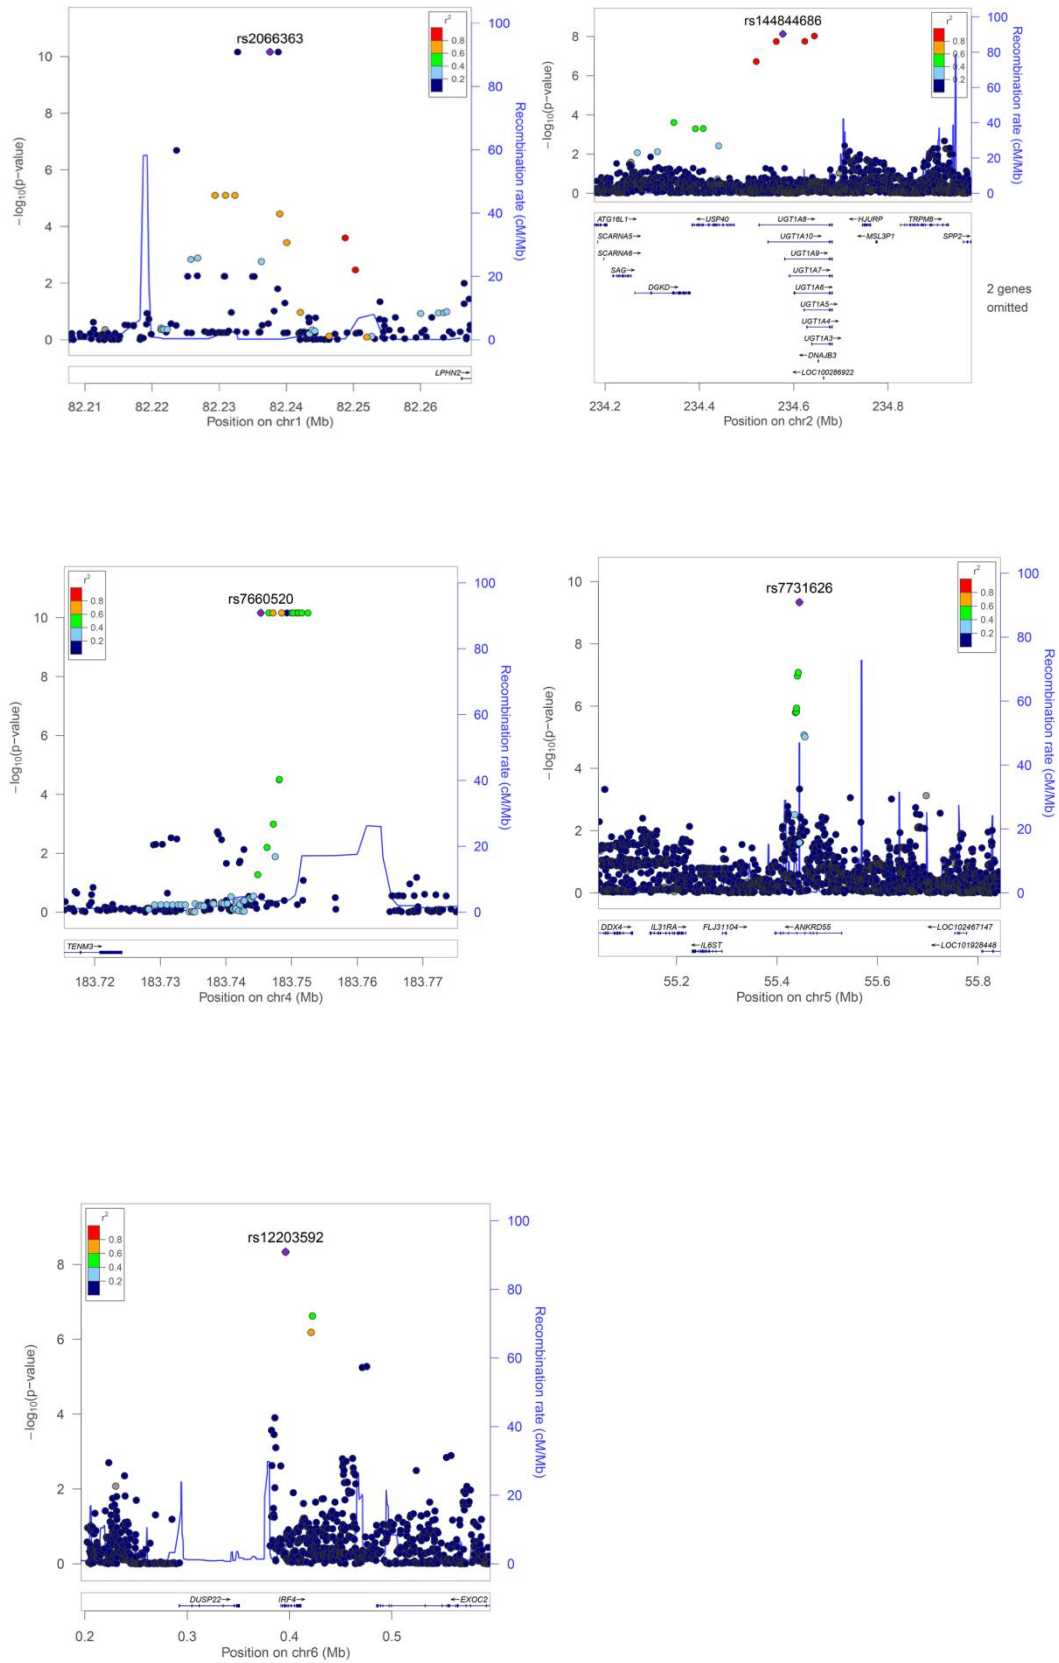

**Fig. S3.** Heatmap showing the association significance of each genome-wide significant SNP with each individual JIA subtype.

| SNP                | Chr       | Pos              | ENT | PRFN | PRFP | OLG | PSO | SYS | UND | P <sub>adj</sub> |
|--------------------|-----------|------------------|-----|------|------|-----|-----|-----|-----|------------------|
| rs2066363          | 1         | 82237577         |     |      |      |     |     |     |     | 6.82E-11         |
| rs144844686        | 2         | 234576970        |     |      |      |     |     |     |     | 7.40E-09         |
| <b>rs7636581</b>   | <b>3</b>  | <b>189781195</b> |     |      |      |     |     |     |     | <b>6.82E-11</b>  |
| <b>rs13119493</b>  | <b>4</b>  | <b>180911259</b> |     |      |      |     |     |     |     | <b>3.26E-08</b>  |
| rs7660520          | 4         | 183745321        |     |      |      |     |     |     |     | 6.82E-11         |
| rs7731626          | 5         | 55444683         |     |      |      |     |     |     |     | 4.62E-10         |
| rs12203592         | 6         | 396321           |     |      |      |     |     |     |     | 4.62E-09         |
| <b>rs114664970</b> | <b>6</b>  | <b>40127169</b>  |     |      |      |     |     |     |     | <b>1.03E-08</b>  |
| <b>rs727845</b>    | <b>7</b>  | <b>67607209</b>  |     |      |      |     |     |     |     | <b>4.49E-08</b>  |
| <b>rs7042370</b>   | <b>9</b>  | <b>12785073</b>  |     |      |      |     |     |     |     | <b>1.39E-09</b>  |
| <b>rs117572873</b> | <b>10</b> | <b>91997663</b>  |     |      |      |     |     |     |     | <b>1.52E-08</b>  |
| rs12795402         | 11        | 32255936         |     |      |      |     |     |     |     | 4.19E-08         |
| rs17703382         | 11        | 30715593         |     |      |      |     |     |     |     | 2.76E-09         |
| <b>rs147585949</b> | <b>16</b> | <b>20726695</b>  |     |      |      |     |     |     |     | <b>1.98E-09</b>  |
| <b>rs11663074</b>  | <b>18</b> | <b>45023793</b>  |     |      |      |     |     |     |     | <b>6.82E-11</b>  |
| <b>rs138816451</b> | <b>22</b> | <b>43649657</b>  |     |      |      |     |     |     |     | <b>1.63E-09</b>  |

**Fig. S4.** Annotation of the GWS and GMS JIA loci with hsGWAS.P<1E-06. For each SNP, grey color indicates no annotation in a particular functional category and other colors indicate reported annotations including functional, conserved, regulatory, epigenomic annotation categories.

Abbreviations: cpg: CPG islands; dgv: copy number variable regions; dnase: DNase hypersensitivity I sites; eqtl: expression quantitative trait loci; gad: known genetic associations; gerp: conserved positions; mir: miRNAs; sift: functional mutations in

SIFT; tfbs: transcription factor binding sites.

| GENE_SNP                                 | eQTL | GAD | GERP | TFBS | Promoter histone marks | Enhancer histone marks | H3K4me1 | H3K4me3 | H3K27ac | H3K9ac | dnase | hsGWAS. P |
|------------------------------------------|------|-----|------|------|------------------------|------------------------|---------|---------|---------|--------|-------|-----------|
| <i>LPHN2</i> _rs2066363                  |      |     |      |      |                        |                        |         |         |         |        |       | 6.82E-11  |
| <i>IL1RAP</i> , <i>CLDN1</i> _rs7636581  |      |     |      |      |                        |                        |         |         |         |        |       | 6.82E-11  |
| <i>DCTD</i> , <i>TENM3</i> _rs7660520    |      |     |      |      |                        |                        |         |         |         |        |       | 6.82E-11  |
| <i>SMAD2</i> _rs11663074                 |      |     |      |      |                        |                        |         |         |         |        |       | 6.82E-11  |
| <i>ANKRD55</i> , <i>IL6ST</i> _rs7731626 |      |     |      |      |                        |                        |         |         |         |        |       | 4.62E-10  |
| <i>TYRP1</i> _rs7042370                  |      |     |      |      |                        |                        |         |         |         |        |       | 1.39E-09  |
| <i>SCUBE1</i> _rs138816451               |      |     |      |      |                        |                        |         |         |         |        |       | 1.63E-09  |
| <i>ACSM1</i> _rs147585949                |      |     |      |      |                        |                        |         |         |         |        |       | 1.98E-09  |
| <i>MPPED2</i> _rs17703382                |      |     |      |      |                        |                        |         |         |         |        |       | 2.76E-09  |
| <i>IRF4</i> _rs12203592                  |      |     |      |      |                        |                        |         |         |         |        |       | 4.62E-09  |
| <i>USP40</i> _rs144844686                |      |     |      |      |                        |                        |         |         |         |        |       | 7.4E-09   |
| <i>LRFN2</i> _rs114664970                |      |     |      |      |                        |                        |         |         |         |        |       | 1.03E-08  |
| <i>KIF20B</i> _rs117572873               |      |     |      |      |                        |                        |         |         |         |        |       | 1.52E-08  |
| intergenic_rs13119493                    |      |     |      |      |                        |                        |         |         |         |        |       | 3.26E-08  |
| <i>RCN1</i> _rs12795402                  |      |     |      |      |                        |                        |         |         |         |        |       | 4.19E-08  |
| intergenic_rs727845                      |      |     |      |      |                        |                        |         |         |         |        |       | 4.49E-08  |
| <i>FANCL</i> _rs112144223                |      |     |      |      |                        |                        |         |         |         |        |       | 7.17E-08  |
| <i>SMAD1</i> _rs143200844                |      |     |      |      |                        |                        |         |         |         |        |       | 7.82E-08  |
| <i>PPP1R1C</i> _rs36029722               |      |     |      |      |                        |                        |         |         |         |        |       | 8.05E-08  |
| <i>RPI-223B1.1</i> _rs11242863           |      |     |      |      |                        |                        |         |         |         |        |       | 9.43E-08  |
| <i>PID1</i> _rs79213572                  |      |     |      |      |                        |                        |         |         |         |        |       | 1.1E-07   |
| <i>RP3-468B3.3</i> _rs1555688            |      |     |      |      |                        |                        |         |         |         |        |       | 1.22E-07  |
| <i>TBC1D5</i> _rs140176242               |      |     |      |      |                        |                        |         |         |         |        |       | 1.29E-07  |
| <i>U6</i> _rs181926896                   |      |     |      |      |                        |                        |         |         |         |        |       | 1.36E-07  |
| <i>MESP2</i> _rs16943576                 |      |     |      |      |                        |                        |         |         |         |        |       | 1.65E-07  |
| <i>VAV3</i> _rs34822619                  |      |     |      |      |                        |                        |         |         |         |        |       | 2.03E-07  |
| <i>SLC12A4</i> _rs3112343                |      |     |      |      |                        |                        |         |         |         |        |       | 2.05E-07  |
| <i>LINC00440</i> _rs2134802              |      |     |      |      |                        |                        |         |         |         |        |       | 2.5E-07   |
| <i>snoU13</i> _rs628920                  |      |     |      |      |                        |                        |         |         |         |        |       | 2.56E-07  |
| <i>UPP1</i> _rs118148285                 |      |     |      |      |                        |                        |         |         |         |        |       | 3.11E-07  |
| <i>LAMA2</i> _rs113941946                |      |     |      |      |                        |                        |         |         |         |        |       | 4.55E-07  |
| <i>NPHP4</i> _rs55857240                 |      |     |      |      |                        |                        |         |         |         |        |       | 5.08E-07  |
| <i>NRCAM</i> _rs74608517                 |      |     |      |      |                        |                        |         |         |         |        |       | 5.09E-07  |
| <i>UNC13A</i> _rs116901991               |      |     |      |      |                        |                        |         |         |         |        |       | 5.32E-07  |
| <i>ATP6V1C1</i> _rs142321521             |      |     |      |      |                        |                        |         |         |         |        |       | 5.63E-07  |
| <i>DRGX</i> _rs7080552                   |      |     |      |      |                        |                        |         |         |         |        |       | 6.03E-07  |
| <i>LRRC16A</i> _rs6918563                |      |     |      |      |                        |                        |         |         |         |        |       | 6.05E-07  |
| <i>MIR548AD</i> _rs2714572               |      |     |      |      |                        |                        |         |         |         |        |       | 6.09E-07  |
| <i>RHOH</i> _rs6856482                   |      |     |      |      |                        |                        |         |         |         |        |       | 6.35E-07  |
| <i>SASH1</i> _rs151039065                |      |     |      |      |                        |                        |         |         |         |        |       | 6.35E-07  |
| <i>RP11-389E17.1</i> _rs189157304        |      |     |      |      |                        |                        |         |         |         |        |       | 6.46E-07  |
| <i>IL21</i> _rs62322747                  |      |     |      |      |                        |                        |         |         |         |        |       | 6.67E-07  |
| <i>KCNV2</i> _rs115112002                |      |     |      |      |                        |                        |         |         |         |        |       | 7.25E-07  |
| <i>MYCBP2</i> _rs73241417                |      |     |      |      |                        |                        |         |         |         |        |       | 9.18E-07  |
| <i>RP11-425113.3</i> _rs115334023        |      |     |      |      |                        |                        |         |         |         |        |       | 9.29E-07  |

**Fig. S5.** The violin plot showing the significant correlation between the SNP genotype and the mRNA level of the gene in immune tissues based on GTeX data.

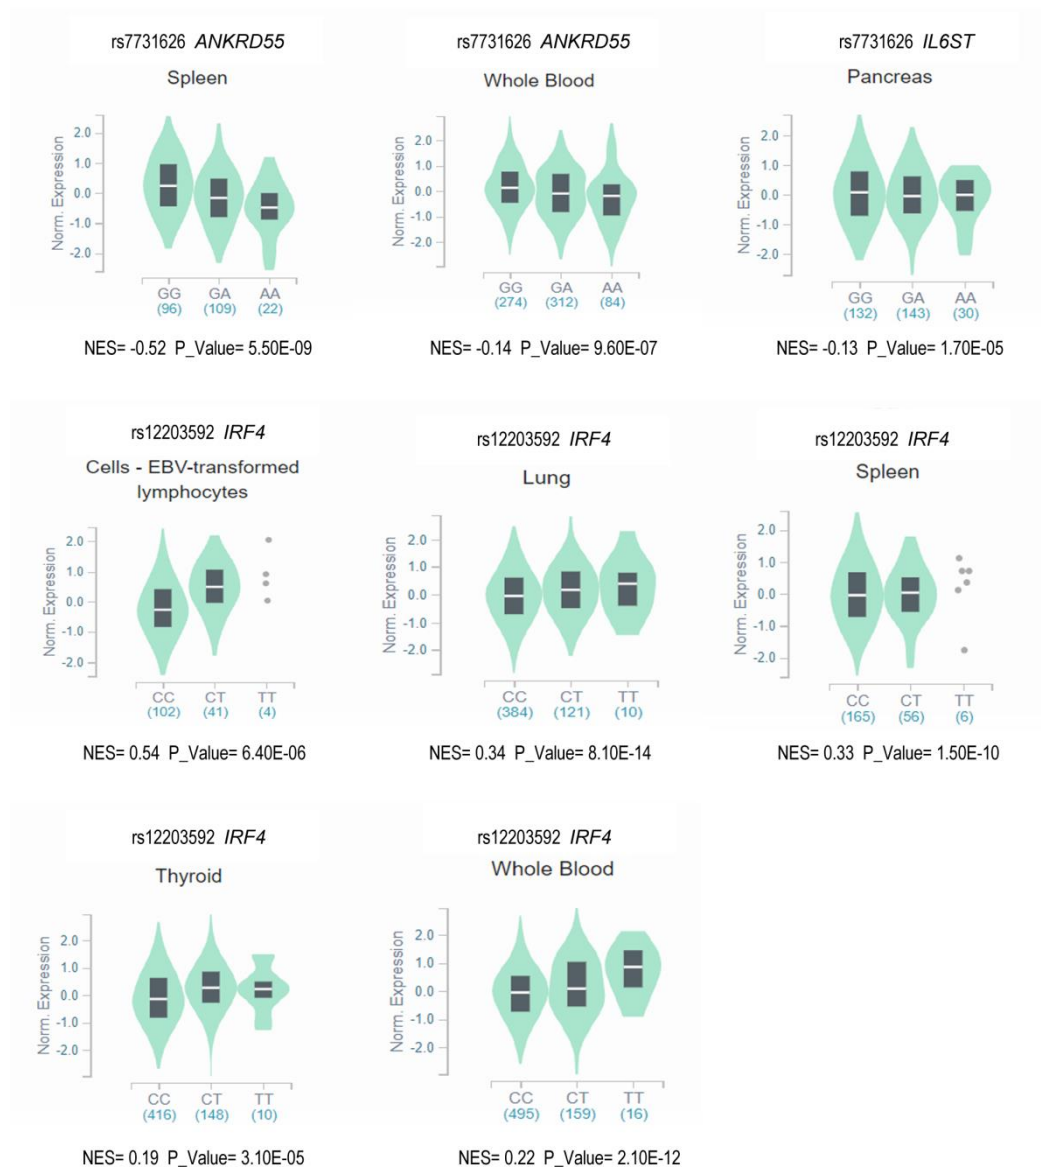



**Fig. S6.** Box plots showing the significant correlation between the SNP genotype and the mRNA level of the gene in immune cell types based on DICE data.

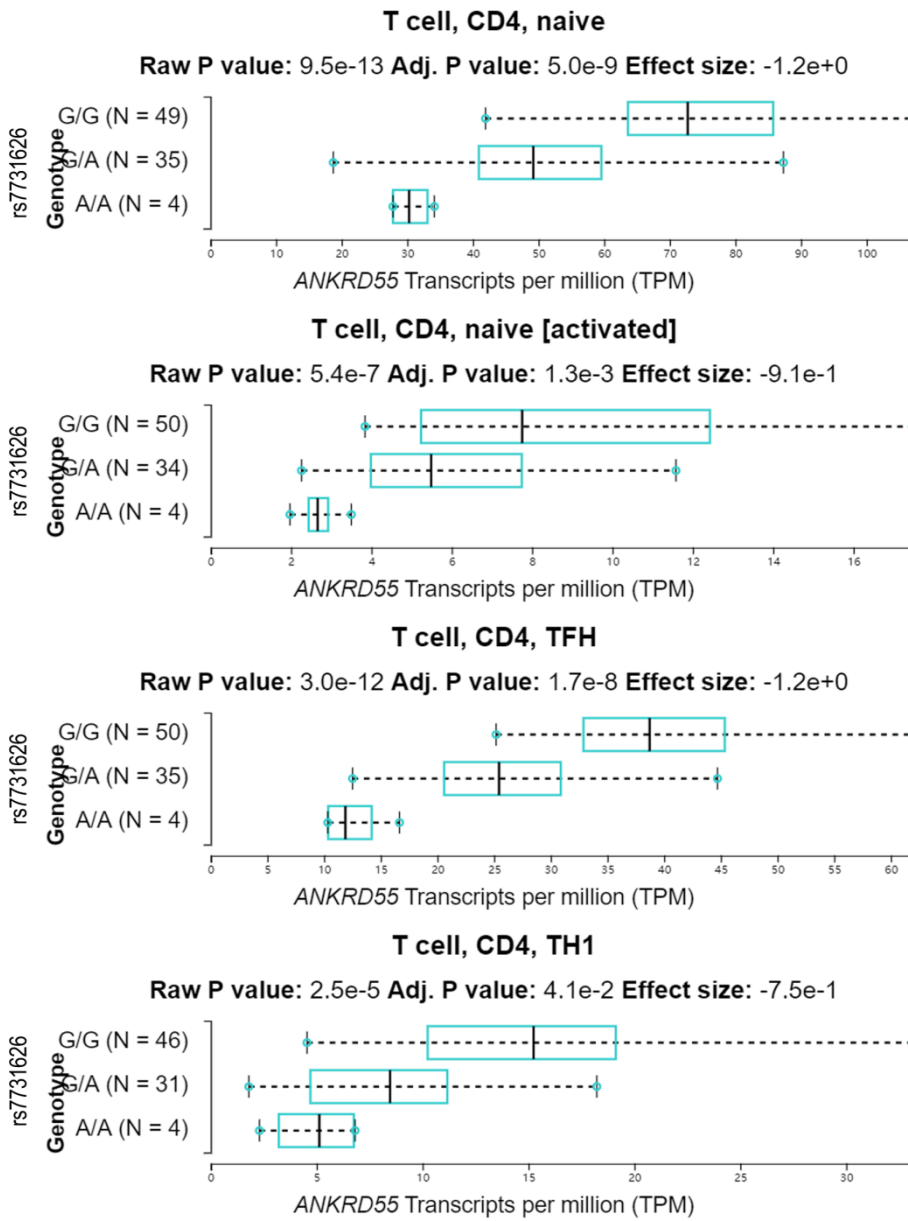

### T cell, CD4, TH2

Raw P value:  $8.6 \times 10^{-7}$  Adj. P value:  $1.6 \times 10^{-3}$  Effect size:  $-8.9 \times 10^{-1}$

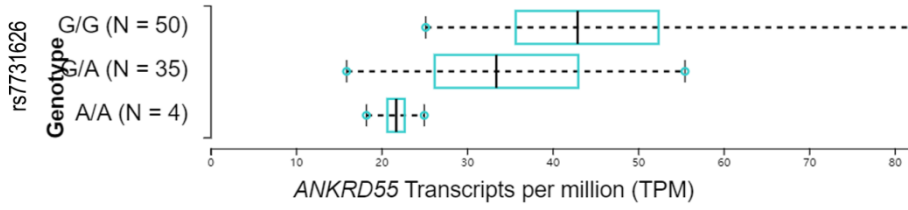

### T cell, CD4, TH17

Raw P value:  $1.8 \times 10^{-6}$  Adj. P value:  $2.9 \times 10^{-3}$  Effect size:  $-8.2 \times 10^{-1}$

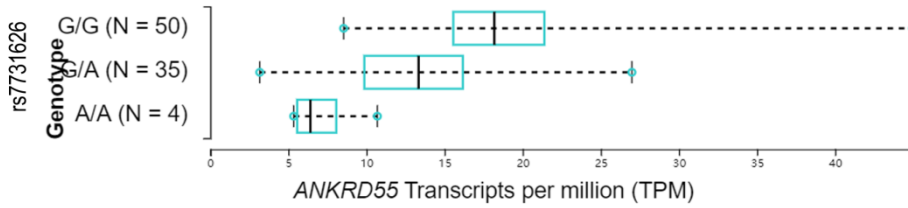

### T cell, CD4, TH1/17

Raw P value:  $5.3 \times 10^{-5}$  Adj. P value:  $5.2 \times 10^{-2}$  Effect size:  $-7.4 \times 10^{-1}$

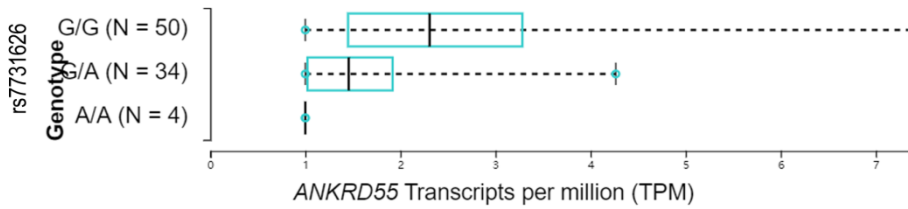

### T cell, CD4, memory TREG

Raw P value:  $3.0 \times 10^{-8}$  Adj. P value:  $9.7 \times 10^{-5}$  Effect size:  $-9.8 \times 10^{-1}$

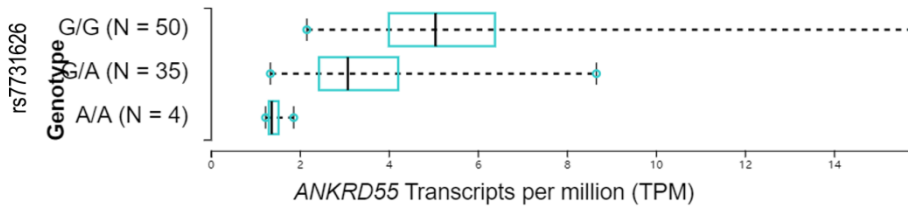

### T cell, CD4, naive TREG

Raw P value: 5.3e-14 Adj. P value: 3.1e-10 Effect size: -1.3e+0

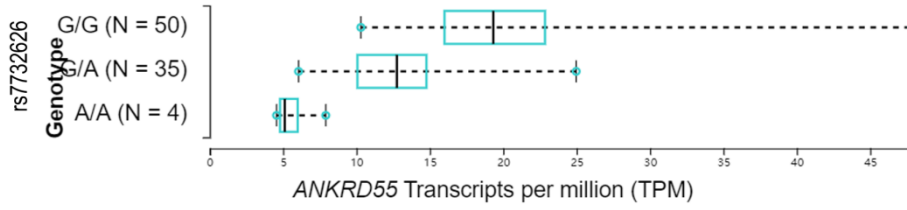

### T cell, CD8, naive

Raw P value: 3.0e-5 Adj. P value: 3.3e-2 Effect size: -7.4e-1

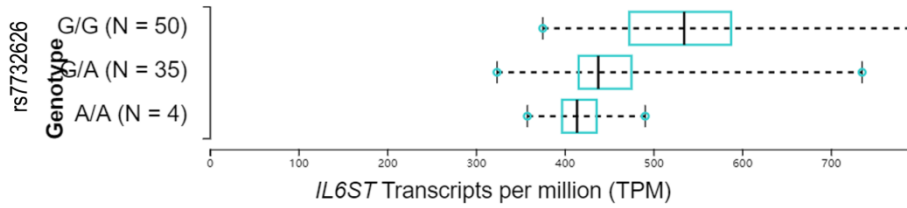

### T cell, CD4, TFH

Raw P value: 4.1e-5 Adj. P value: 4.5e-2 Effect size: -7.6e-1

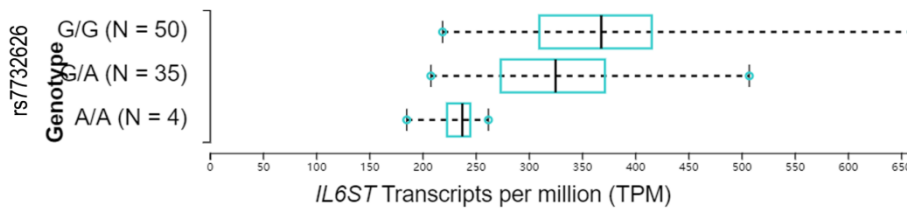

### T cell, CD4, naive TREG

Raw P value: 4.3e-6 Adj. P value: 6.4e-3 Effect size: -8.1e-1

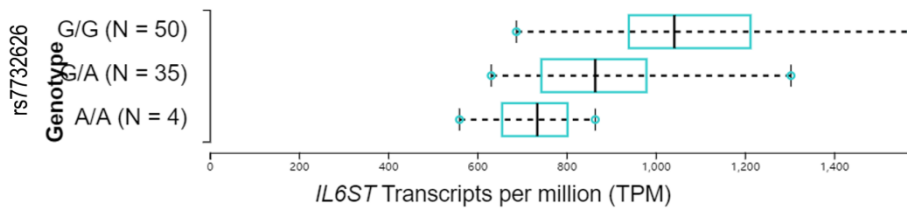

**Fig. S7.** The circus plots showing the chromatin interactions between each JIA locus and other chromatin regions.

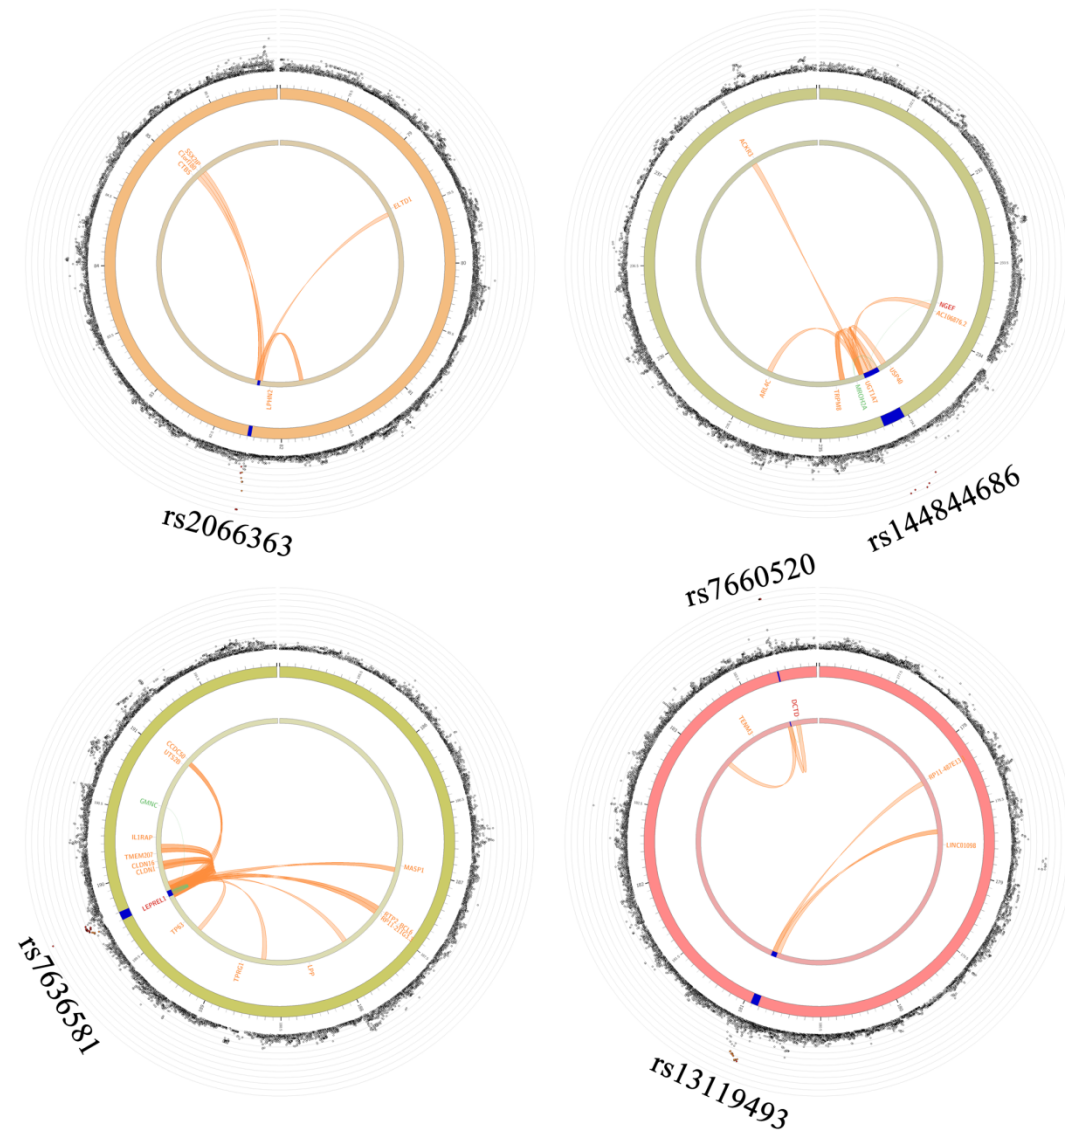

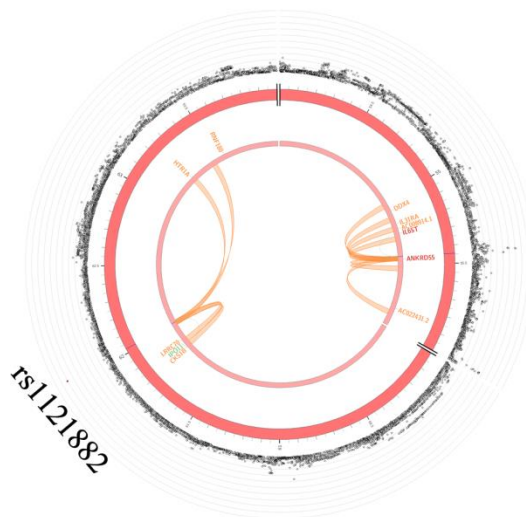

rs7731626

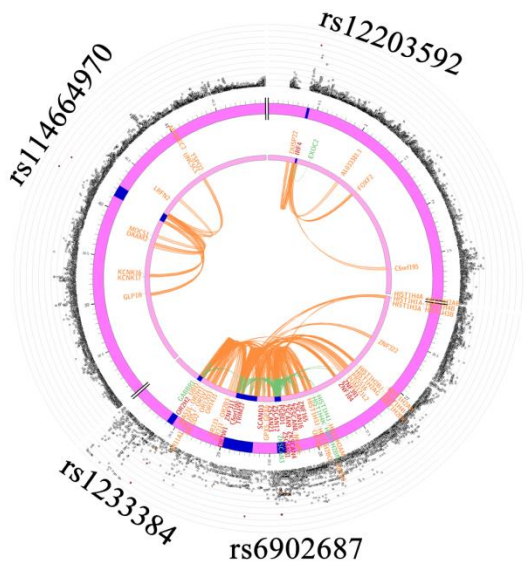

rs12203592

rs1233384

rs6902687

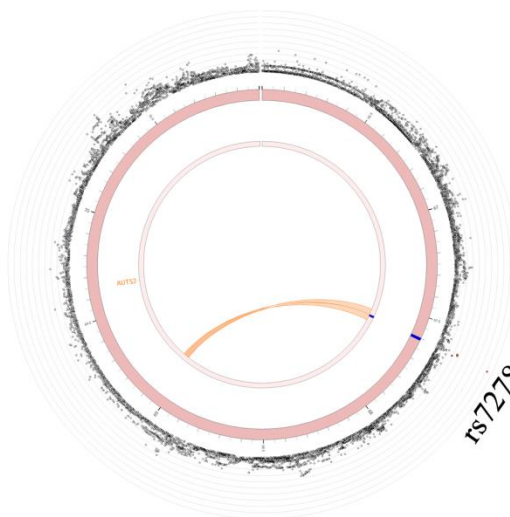

rs727845

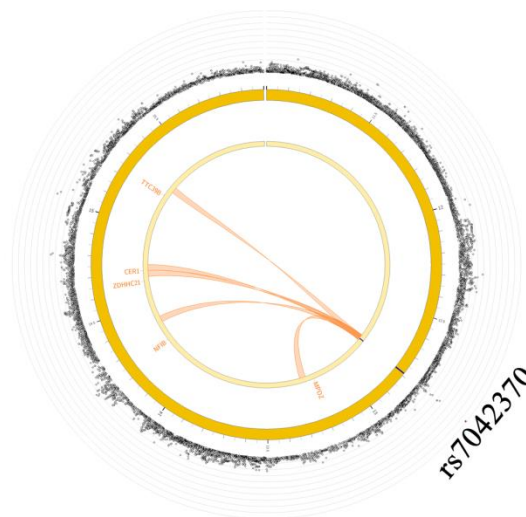

rs7042370

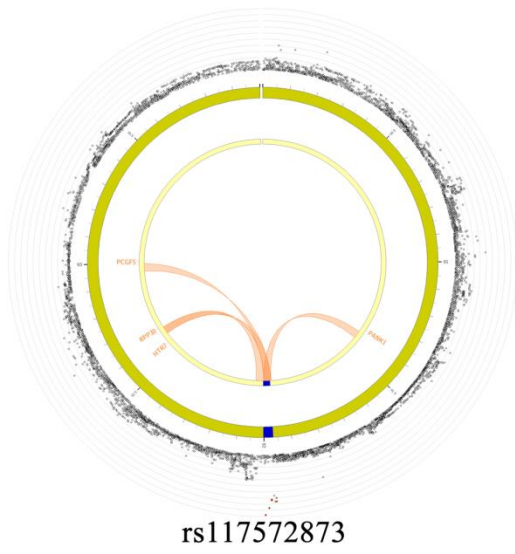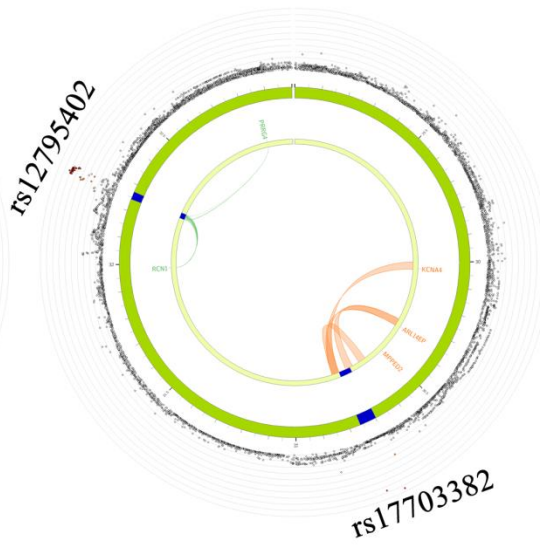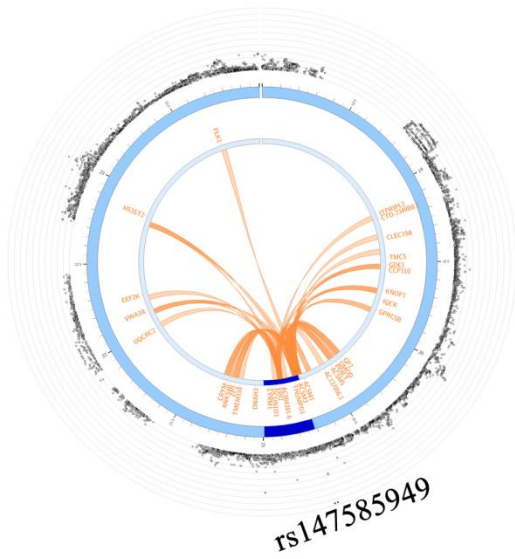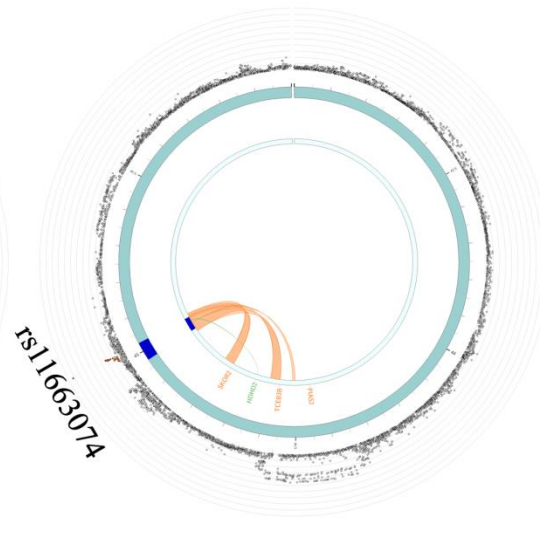



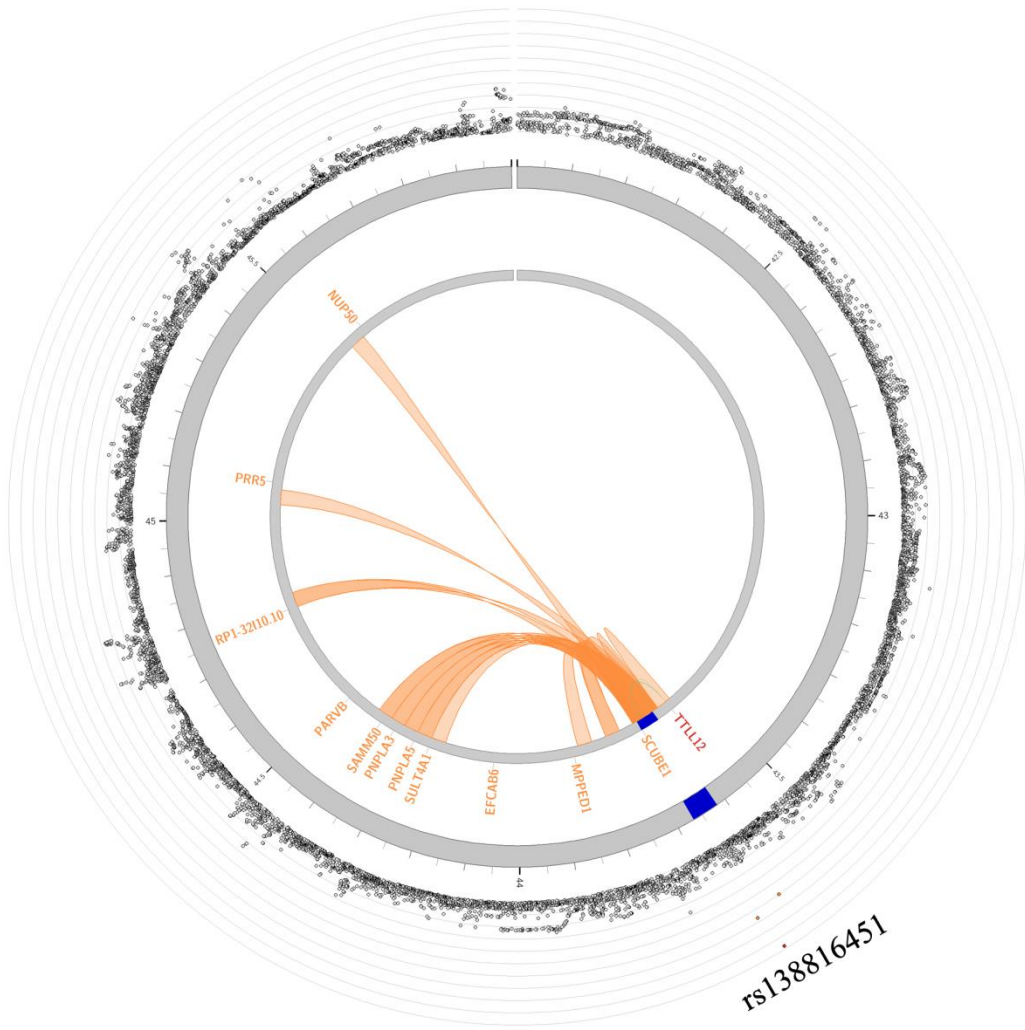

**Fig. S8.** Candidate genes at genome-wide significant loci are expressed at medium to high level in immune cell types.

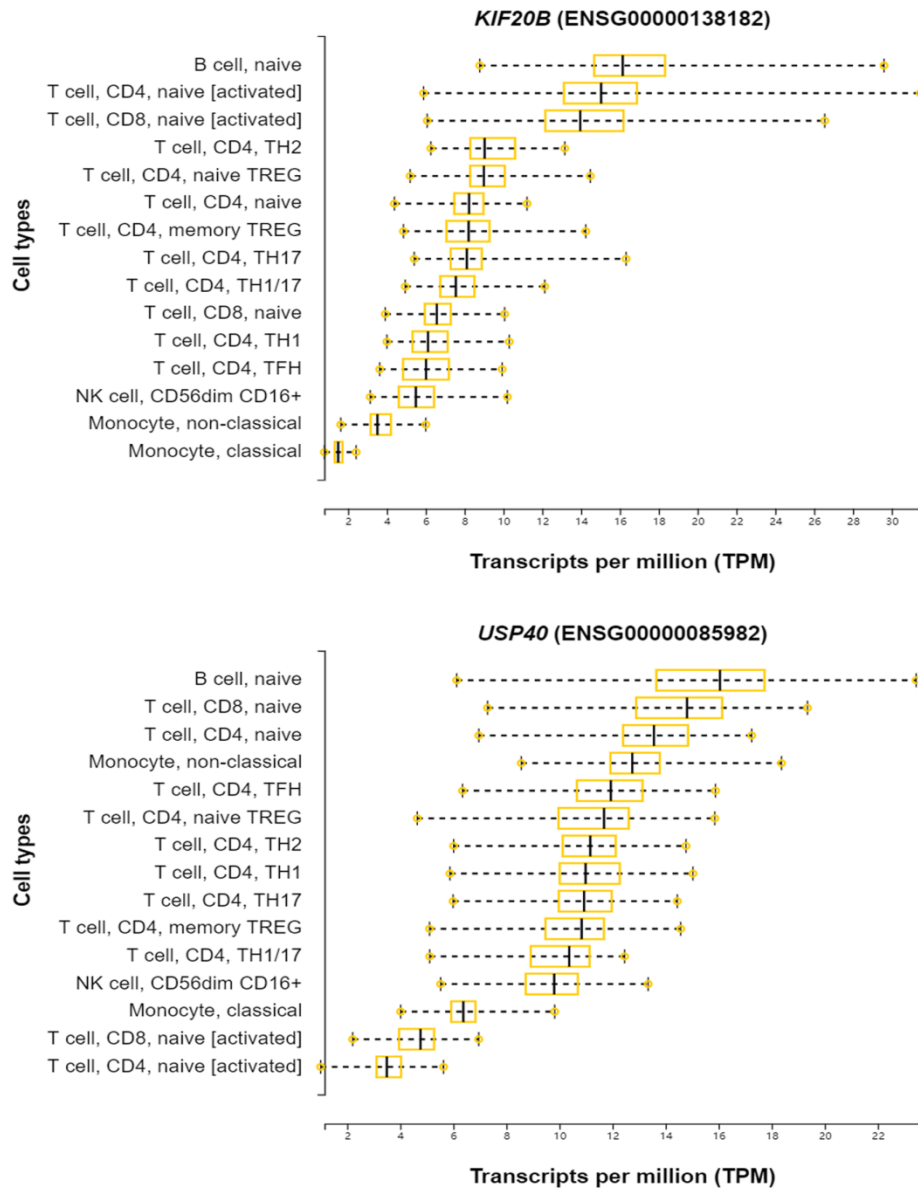



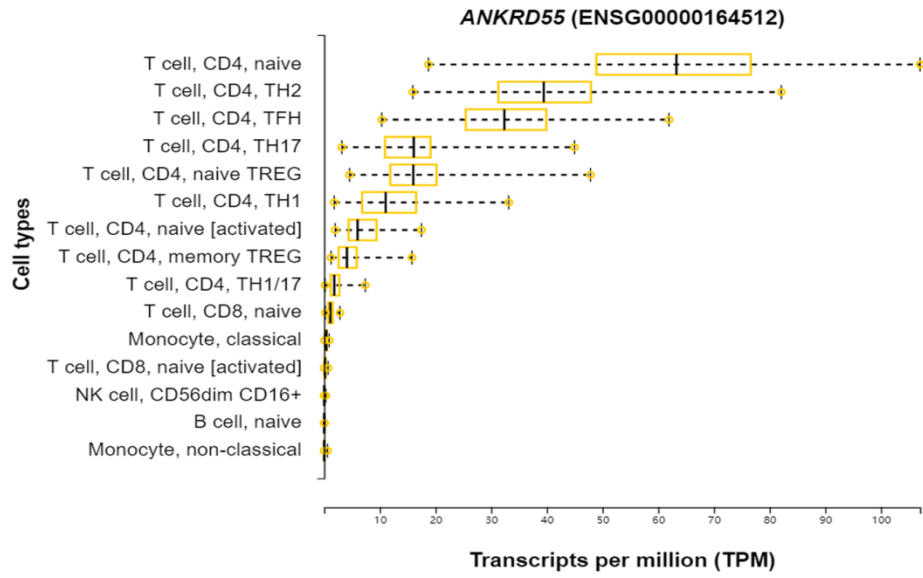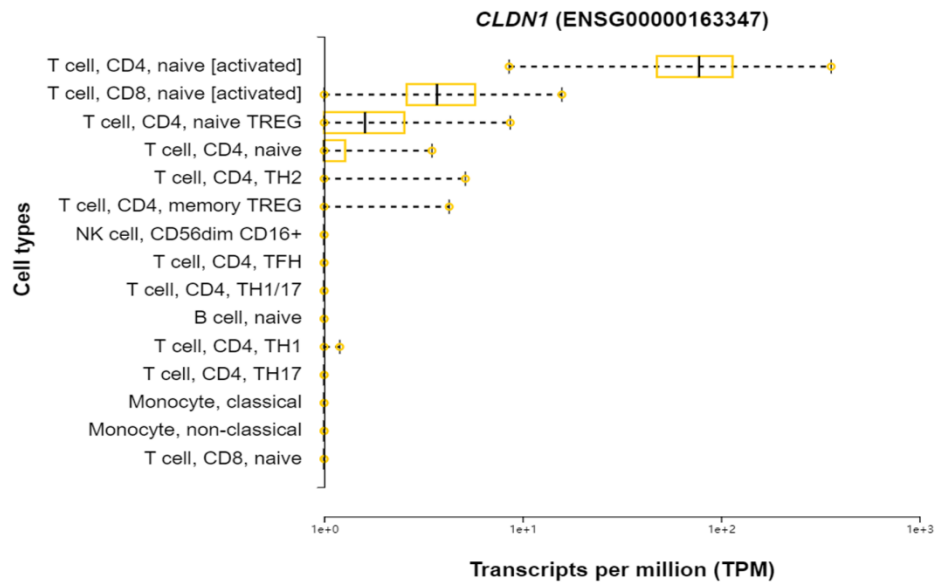

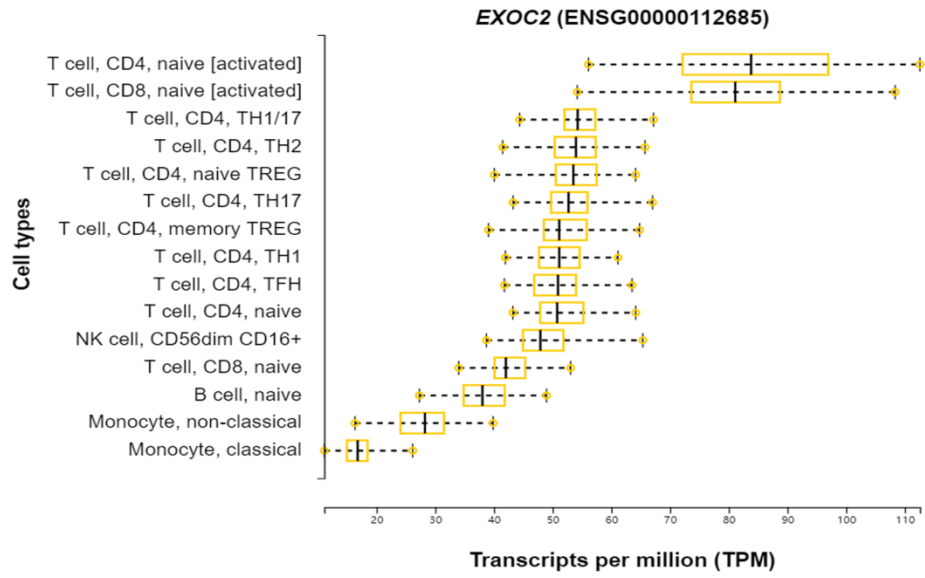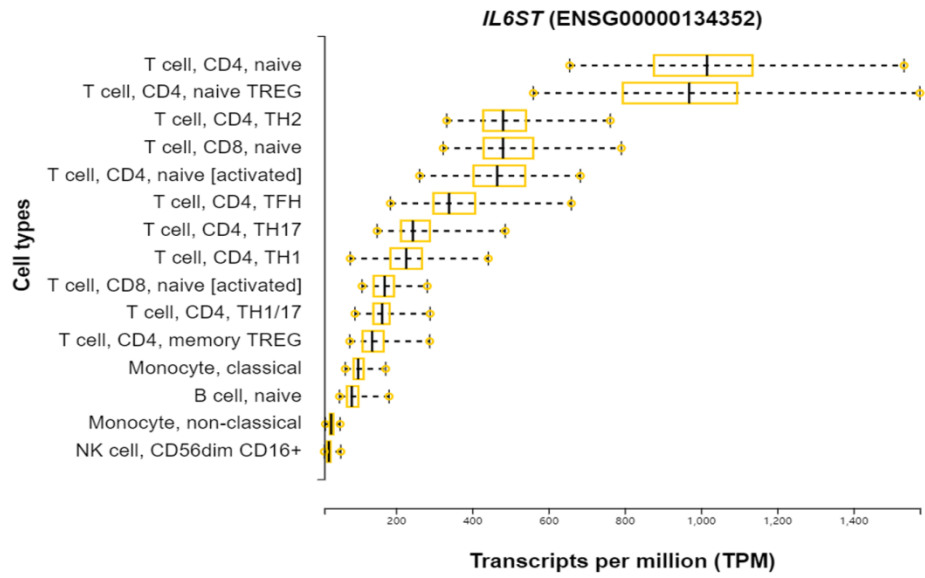

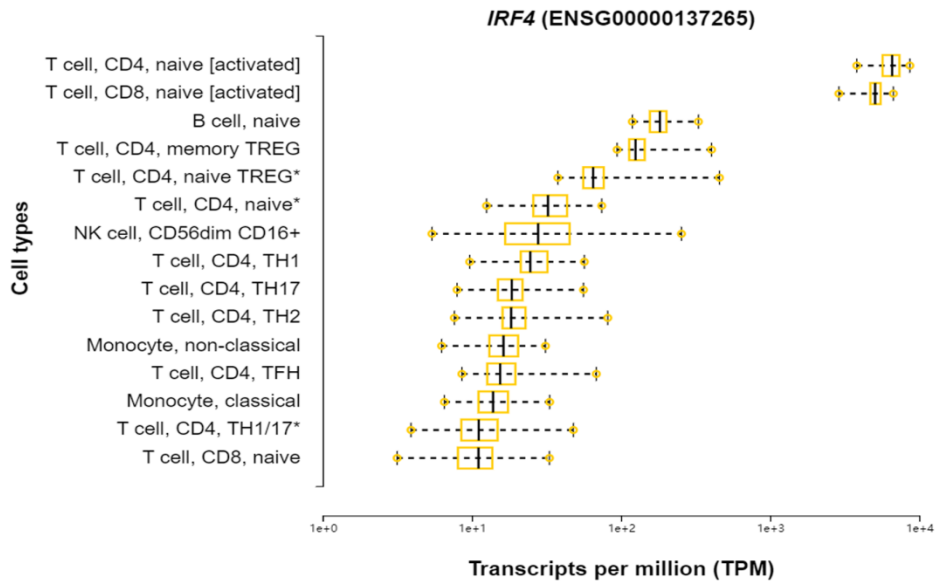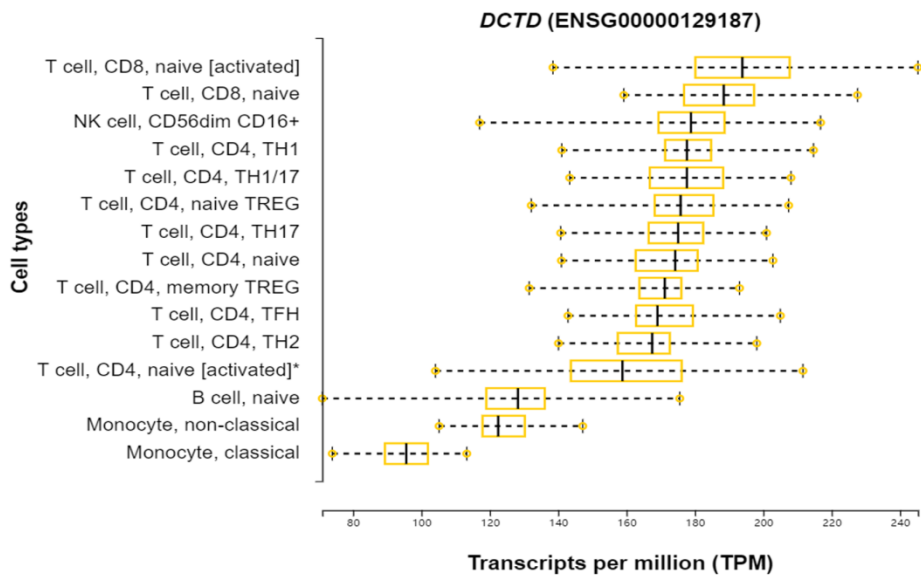

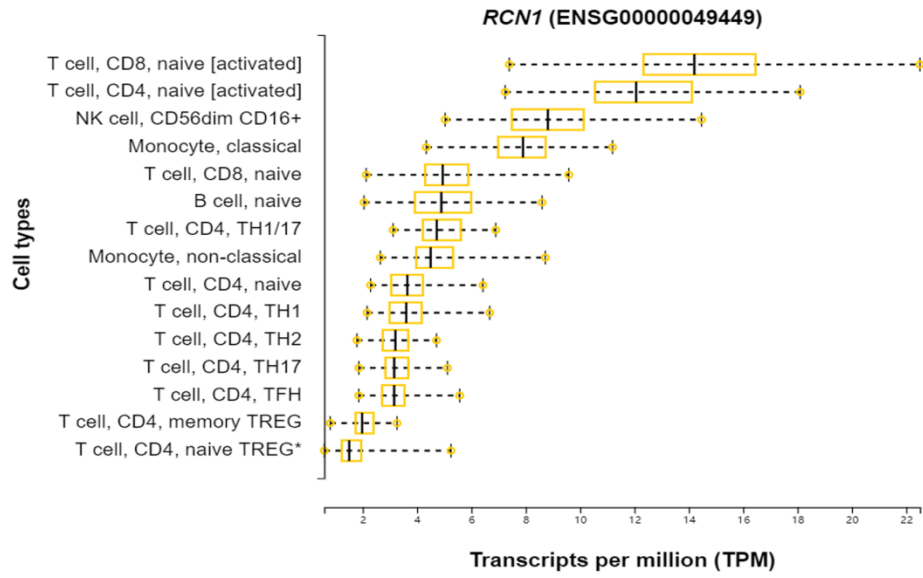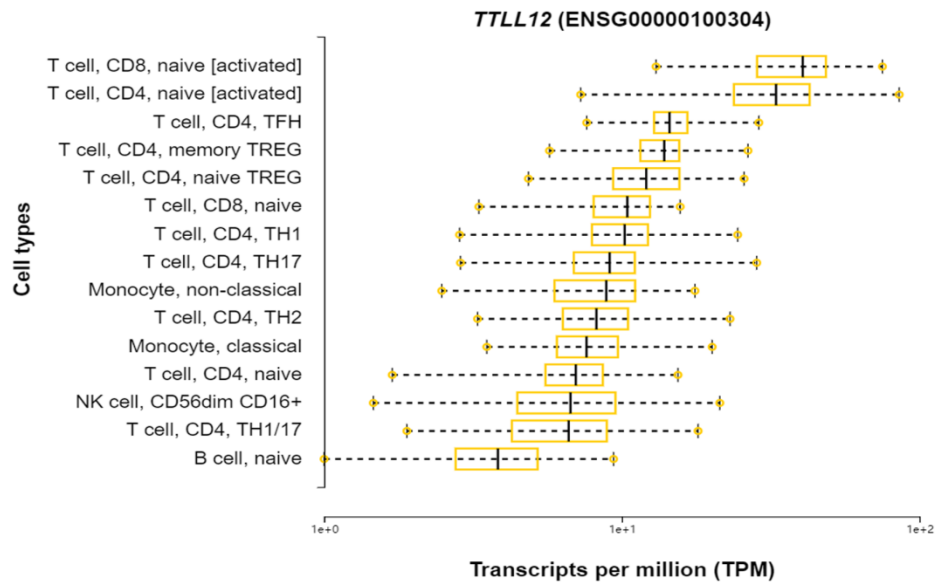

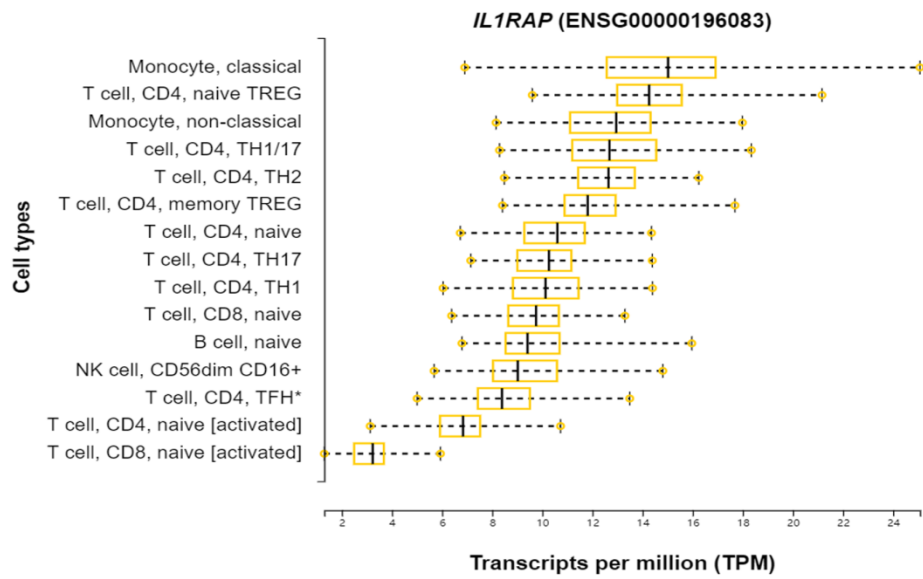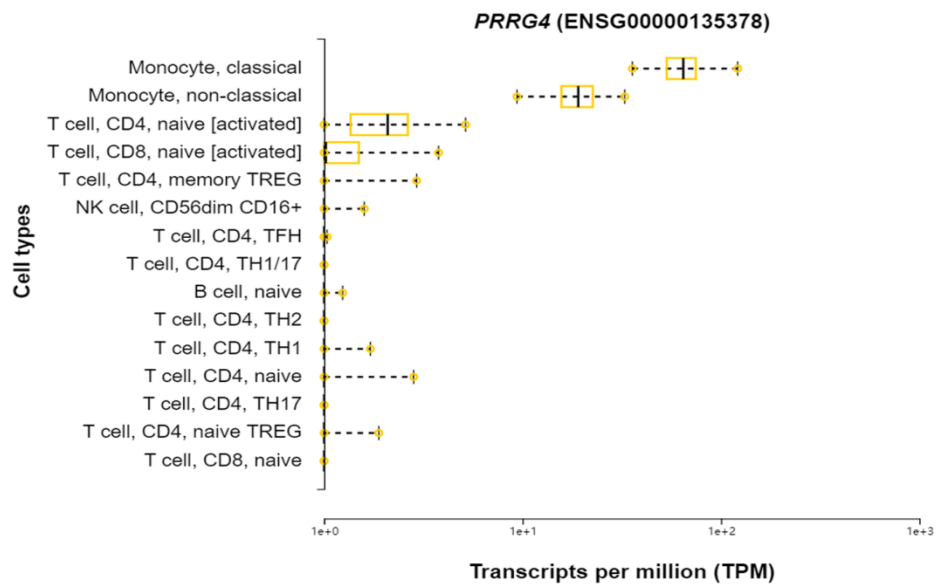

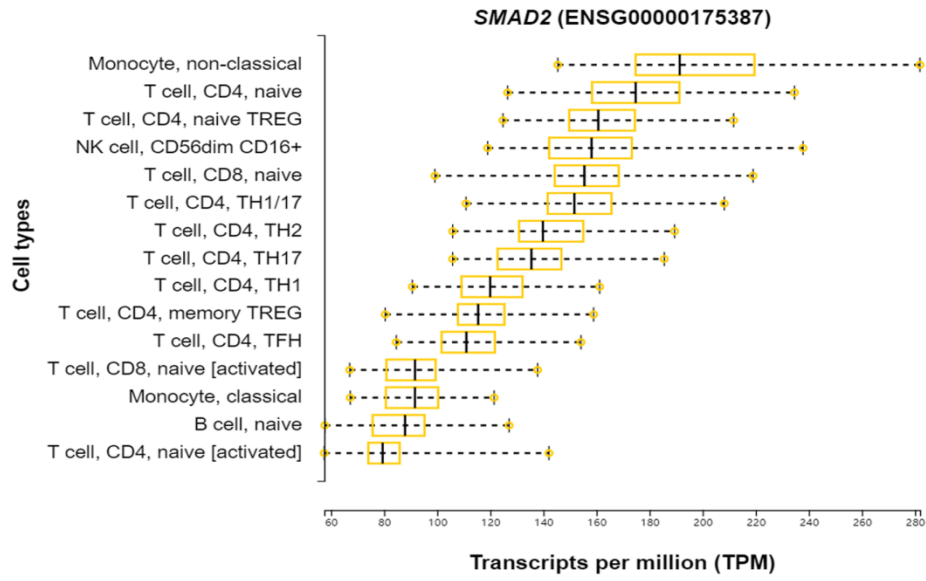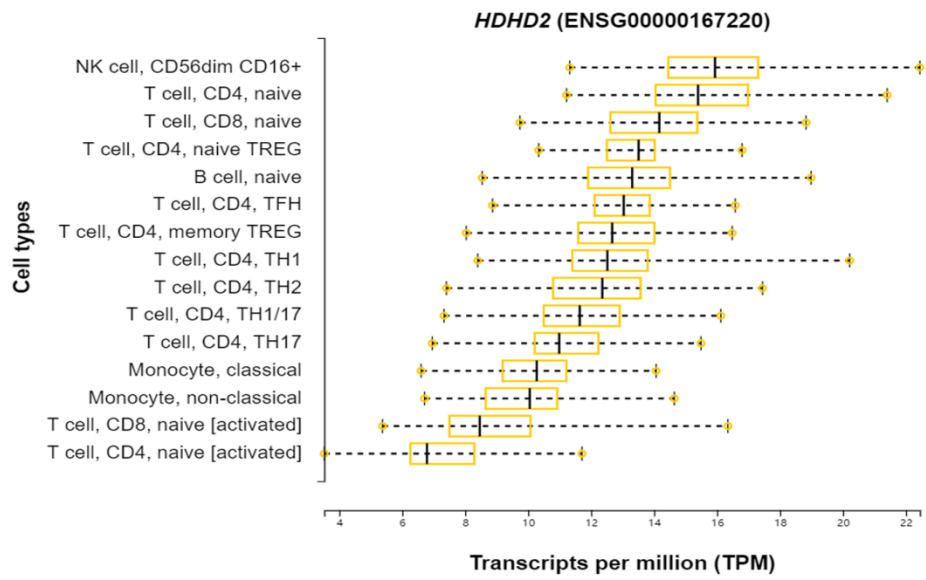

**Fig. S9.** PPI network constructed based on our JIA hsGWAS results.

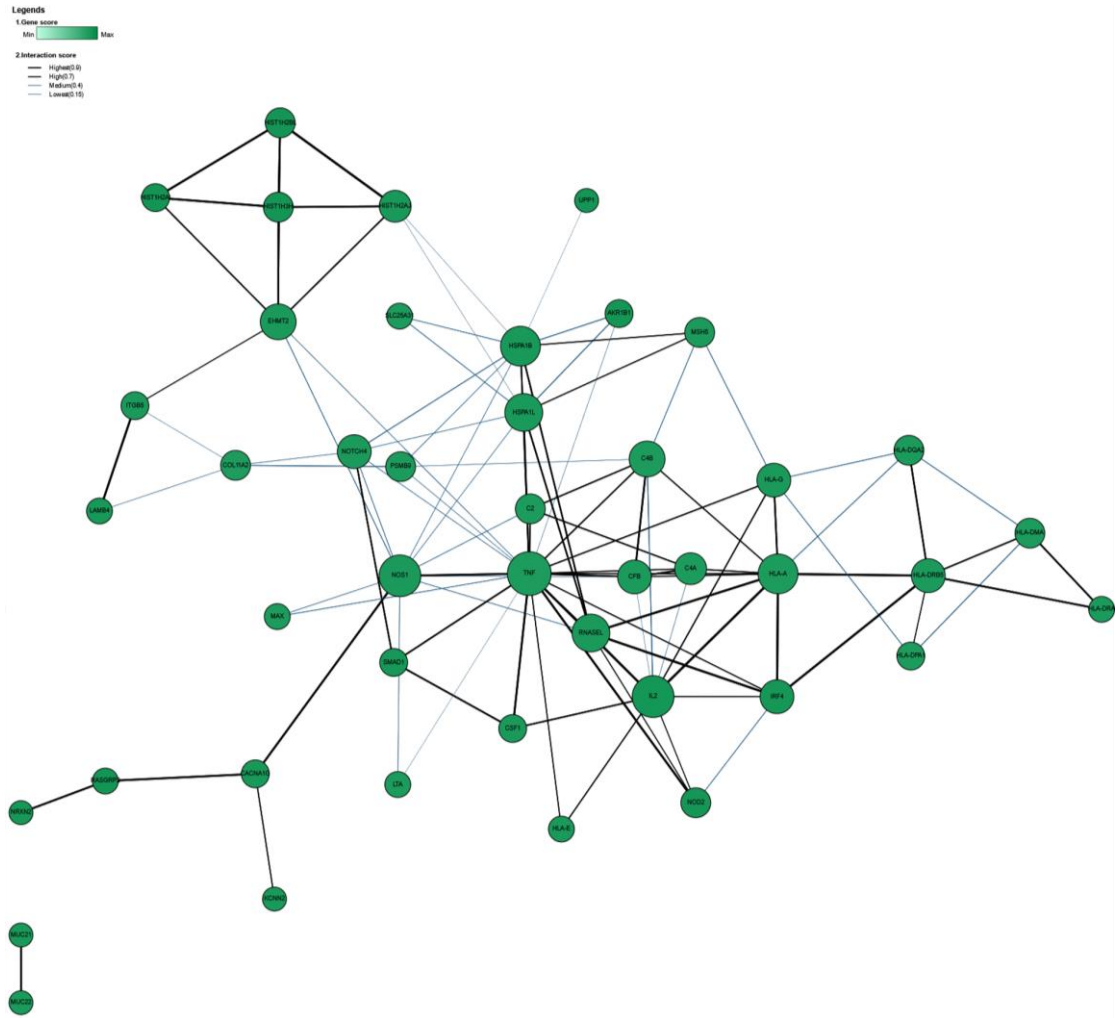

Supplement: Supplementary file [file 2020.09.01.20185603-1.pdf]
